# Supplementary material for: Aptamer Conjugated Indium Phosphide Quantum Dots with a Zinc Sulphide Shell as Photoluminescent Labels for Acinetobacter baumannii
Source: MDPI journal article supplement (doi:10.3390/nano11123317), 2021-12-07
Supplement: s1 [file s1]

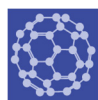

## Supplementary Material

# Aptamer Conjugated Indium Phosphide Quantum Dots with a Zinc Sulfide Shell as Photoluminescent Labels for *Acinetobacter baumannii*

Zeineb Ayed <sup>1,2</sup>, Shiana Malhotra <sup>3</sup>, Garima Dobhal <sup>3</sup> and Renee V. Goreham <sup>3,\*</sup><sup>1</sup> The MacDiarmid Institute, Wellington 6012, New Zealand; zeineb.ayed@vuw.ac.nz<sup>2</sup> School of Chemical Physical Sciences, Victoria University of Wellington, Kelburn, Wellington 6012, New Zealand<sup>3</sup> School of Mathematical and Physical Sciences, University of Newcastle, Newcastle NSW 2308, Australia; shiana.malhotra@uon.edu.au (S.M.); gsd534@newcastle.edu.au (G.D.)

\* Correspondence: renee.goreham@newcastle.edu.au; Tel.: +61-086-7066

**Citation:** Ayed, Z.; Malhotra, S.; Dobhal, G.; Goreham, R.V. Aptamer Conjugated Indium Phosphide Quantum Dots with a Zinc Sulfide Shell as Photoluminescent Labels for *Acinetobacter baumannii*. *Nanomaterials* **2021**, *11*, 3317. <https://doi.org/10.3390/nano11123317>

Received: 9 November 2021

Accepted: 3 December 2021

Published: 7 December 2021

**Publisher's Note:** MDPI stays neutral with regard to jurisdictional claims in published maps and institutional affiliations.

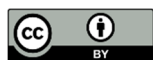

**Copyright:** © 2021 by the authors. Submitted for possible open access publication under the terms and conditions of the Creative Commons Attribution (CC BY) license (<https://creativecommons.org/licenses/by/4.0/>).

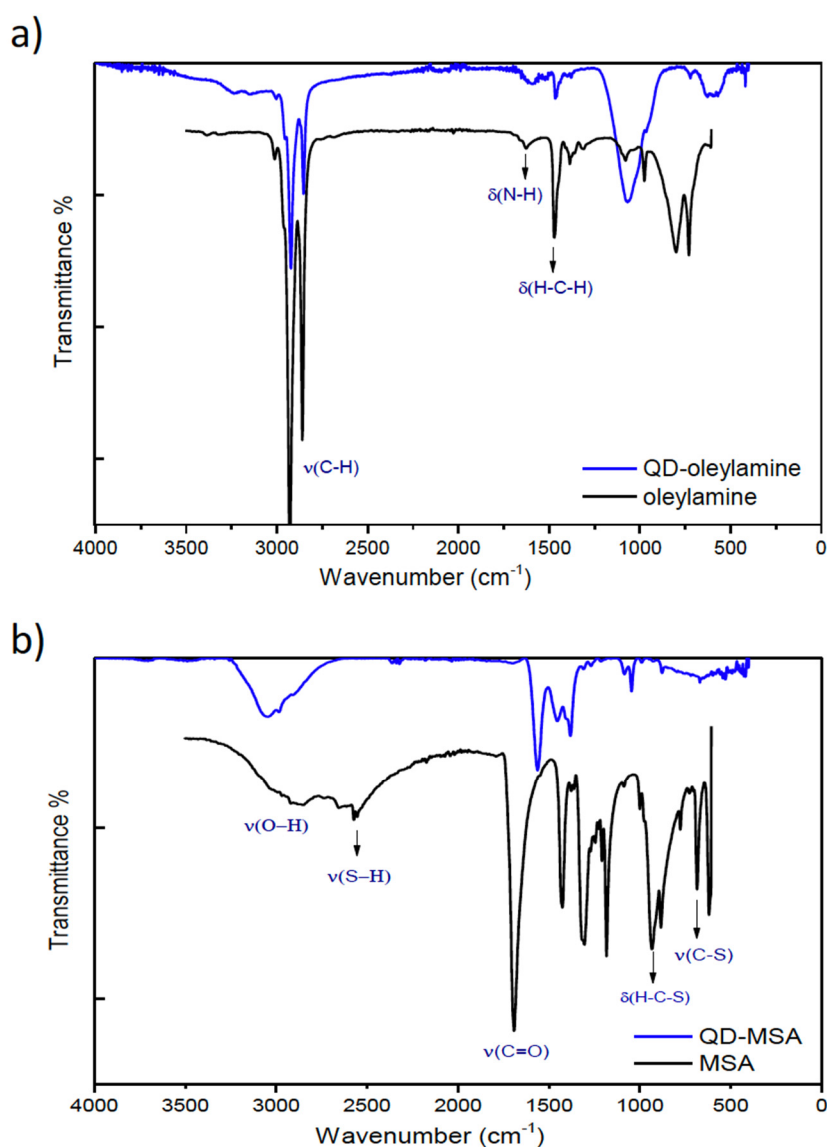

**Figure S1.** Fourier transform infrared spectroscopy (FTIR) spectra of the InP/ZnS QDs-oleylamine (a), and InP/ZnS QDs-MSA (b).

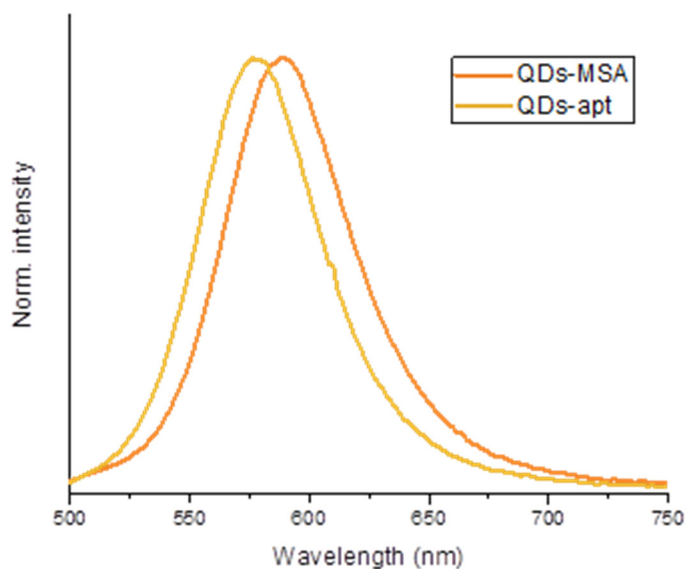

**Figure S2.** Normalized emission spectra of QDs-MSA and QDs-Aptamer. Excitation  $\lambda_{\text{ex}} = 480$  nm.

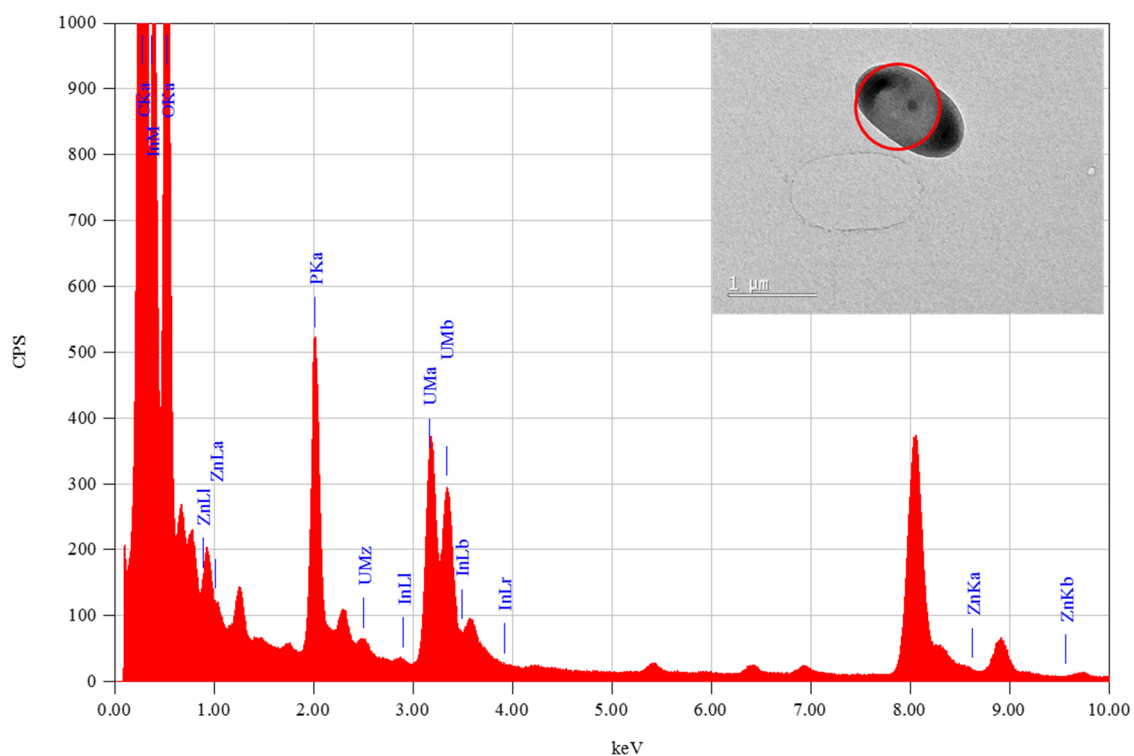

**Figure S3.** EDS spectrum of *A. baumannii* stained with uranyl acetate showing high phosphorous and uranyl peaks and no traces of Zinc or Indium. Inset is a TEM image of the bacterium and the location of the EDS. Unit: CPS: Count/sec.

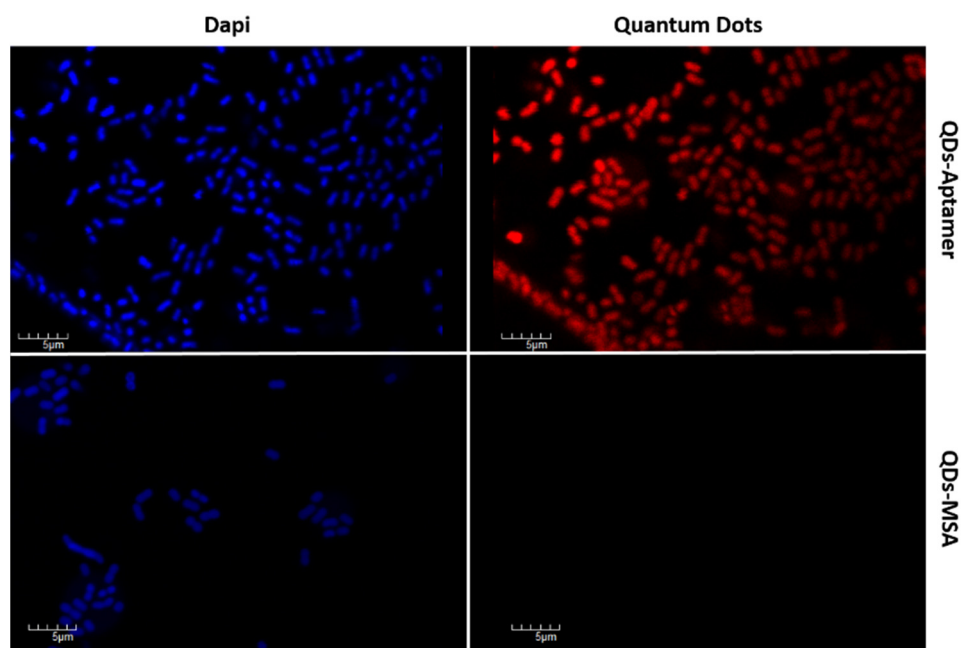

**Figure S4.** Confocal images of *A. baumannii* (AB11) targeted with QDs-aptamer (top) and QDs-MSA (bottom). Images show DAPI staining the cells RNA with blue, QDs staining the cells with red. Scale-bar is 5  $\mu$ m.

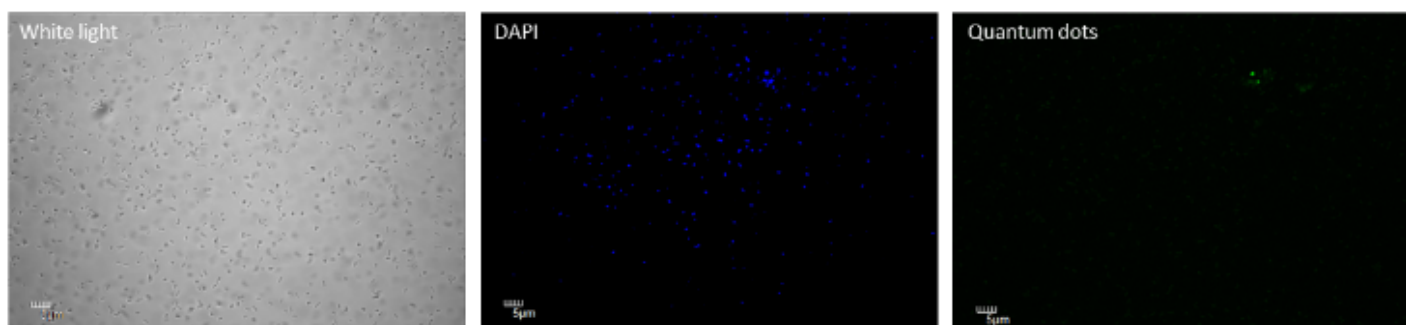

**Figure S5.** Confocal images of DAPI stained *P. aeruginosa* mixed with QDs-aptamer. Scale-bar is 5  $\mu$ m.

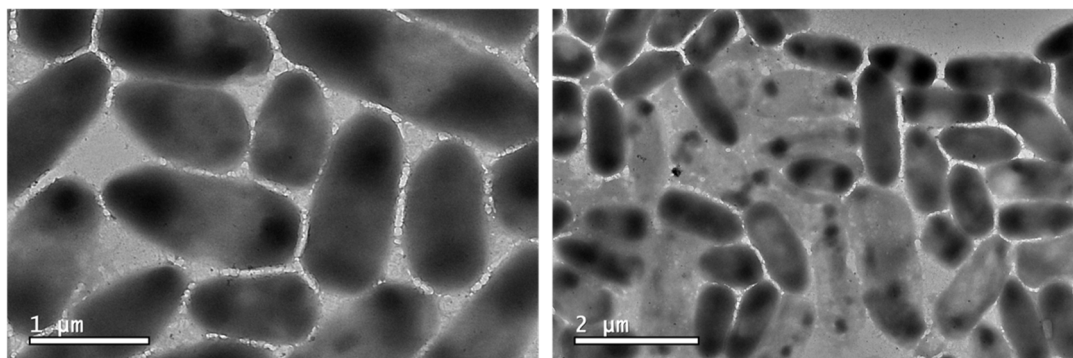

**Figure S6.** TEM images of Uranyl acetate-stained *P. aeruginosa* cells with QDs-Aptamer showing clear transparent membrane.
